# Supplementary material for: Estimated 24 h Urinary Sodium-to-Potassium Ratio Is Related to Renal Function Decline: A 6-Year Cohort Study of Japanese Urban Residents
Source: MDPI journal article supplement (doi:10.3390/ijerph17165811), 2020-08-11
Supplement: s1 [file s1]

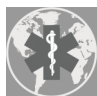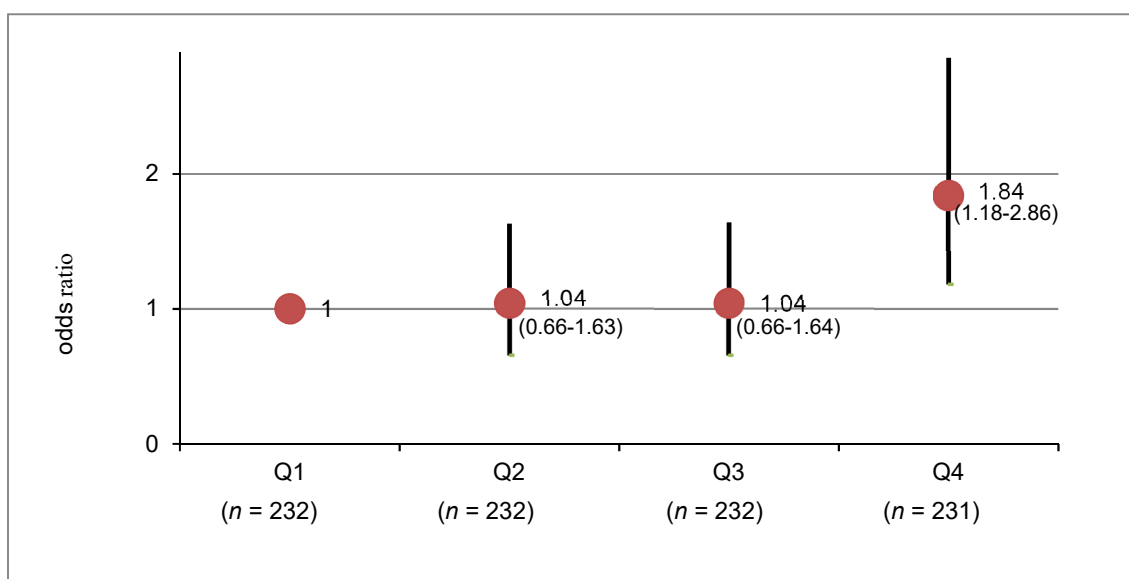

**Figure S1.** Multivariate-adjusted odds ratio for eGFR decrease according to the quartile groups of UNa/K levels. Q1:  $UNa/K < 1.3$ ; Q2:  $1.3 \leq UNa/K < 1.9$ ; Q3:  $1.9 \leq UNa/K < 2.6$ ; Q4:  $UNa/K \geq 2.6$ . Data are odds ratio and 95% confidence interval. Logistic regression models were used. Adjusted for sex, age, BMI, cigarettesmoking (current/past/none), alcohol drinking (current/past/none), HDL-C, LDL-C, HbA1c, eGFR (baseline), hypertension. eGFR: estimated glomerular filtration rate, BMI: body mass index, HDL-C: high-density lipoprotein cholesterol, LDL-C: low-density lipoprotein cholesterol, hypertension: SBP  $\geq 130$  or/and DBP  $\geq 80$ .
