# Supplementary material for: Estimated 24 h Urinary Sodium-to-Potassium Ratio Is Related to Renal Function Decline: A 6-Year Cohort Study of Japanese Urban Residents
Source: MDPI journal article supplement (doi:10.3390/ijerph17165811), 2020-08-11
Supplement: s1 [file s1]

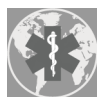

**Table S1.** Multivariate-adjusted means of eGFR and its 6-year change according to the quartile groups of UNa/K levels.

|                                                        | Q1 ( <i>n</i> = 232) |          |   |        | Q2 ( <i>n</i> = 232) |          |   |        | Q3 ( <i>n</i> = 232) |          |   |        | Q4 ( <i>n</i> = 231) |          |   |        | <i>p</i> -Value |
|--------------------------------------------------------|----------------------|----------|---|--------|----------------------|----------|---|--------|----------------------|----------|---|--------|----------------------|----------|---|--------|-----------------|
|                                                        | Mean                 | (95% CI) |   |        | Mean                 | (95% CI) |   |        | Mean                 | (95% CI) |   |        | Mean                 | (95% CI) |   |        |                 |
| Egfr (6 years later), mL/min/1.73m <sup>2</sup>        | 75.0                 | (74.5    | – | 75.5)  | 74.6                 | (74.1    | – | 75.1)  | 74.5                 | (74.0    | – | 75.0)  | 73.4                 | (72.9    | – | 73.9)  | <0.001          |
| eGFR amount of change, mL/min/1.73m <sup>2</sup> /year | -0.71                | (-0.80   | – | -0.62) | -0.77                | (-0.86   | – | -0.69) | -0.80                | (-0.88   | – | -0.71) | -0.97                | (-1.06   | – | -0.88) | <0.001          |
| change rate in eGFR, %/year                            | -0.88                | (-1.01   | – | -0.76) | -0.97                | (-1.09   | – | -0.85) | -1.01                | (-1.13   | – | -0.90) | -1.24                | (-1.36   | – | -1.12) | 0.001           |

Q1: UNa/K < 1.3; Q2: 1.3 ≤ UNa/K < 1.9; Q3: 1.9 ≤ UNa/K < 2.6; Q4: UNa/K ≥ 2.6; Data are presented as mean and 95% confidence interval. Analysis of variance were used to adjust for sex, age, BMI, cigarettes smoking (current/past/none), alcohol drinking (current/past/none), HDL-C, LDL-C, HbA1c, eGFR (baseline), hypertension. *p*-Values for difference between groups. eGFR: estimated glomerular filtration rate, BMI: body mass index, HDL-C: high-density lipoprotein cholesterol, LDL-C: low-density lipoprotein cholesterol, hypertension: SBP ≥ 130 or/and DBP ≥ 80.
